# Supplementary material for: TGFB1 genetic polymorphisms and coronary heart disease risk: a meta-analysis
Source: PubMed Central journal article supplement (PMC3497590; doi:10.1186/1471-2350-13-39), 2012-05-18

### Additional file 3

**Figure 1** Funnel plots with pseudo 95% confidence intervals for rs1800469 analysed according to different genotype contrasts. A. Comparison of the homozygous TT genotype with the wild type CC genotype (fixed-effect model,  $p$  for Egger's regression test = 0.05); B. Comparison of the heterozygous CT genotype with the wild type CC genotype (fixed-effect model,  $p$  for Egger's regression test = 0.61); C. Comparison of the TT+CT genotype with the wild type CC genotype (fixed-effect model,  $p$  for Egger's regression test = 0.22).

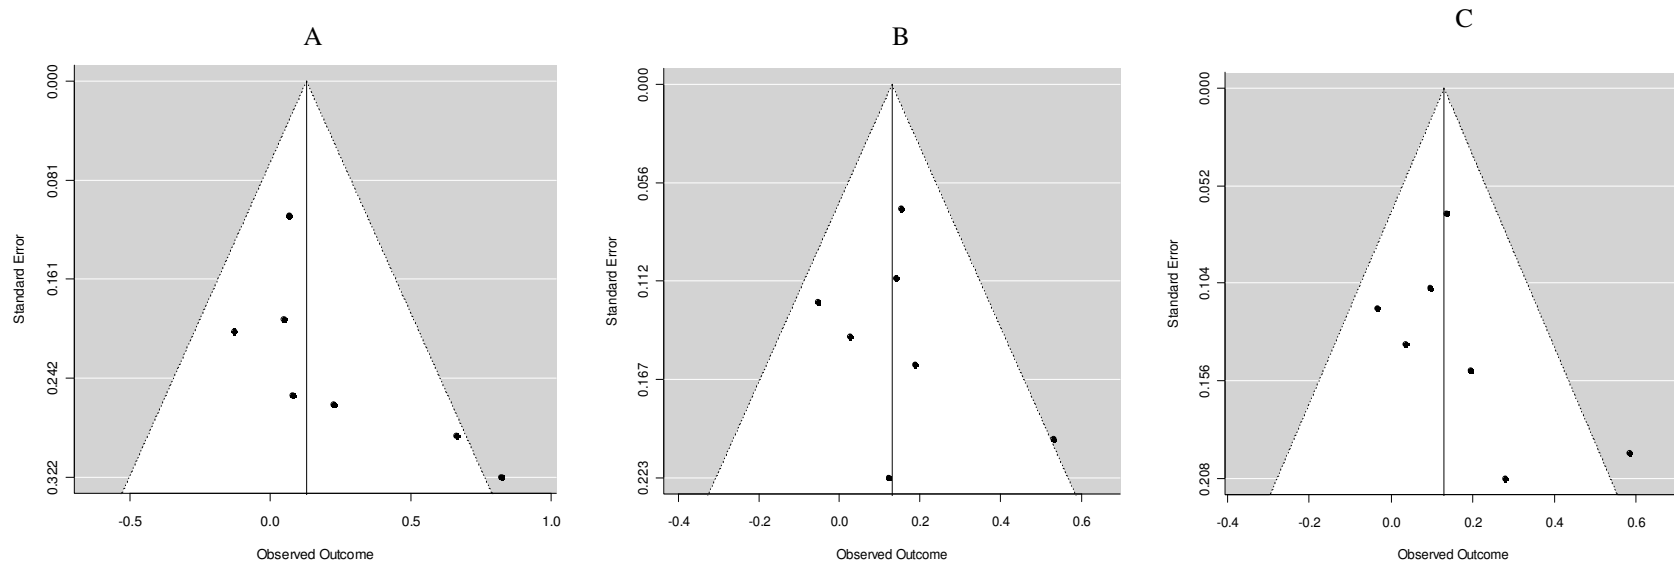

**Figure 2** Funnel plots with pseudo 95% confidence intervals for rs1982073 analysed according to different genotype contrasts. A. Comparison of the homozygous CC genotype with the wild type TT genotype (random-effect model,  $p$  for Egger's regression test = 0.94); B. Comparison of the heterozygous TC genotype with the wild type TT genotype (random-effect model,  $p$  for Egger's regression test = 0.50); C. Comparison of the variant genotype of CC+TC with the wild type TT genotype (random-effect model,  $p$  for Egger's regression test = 0.71).

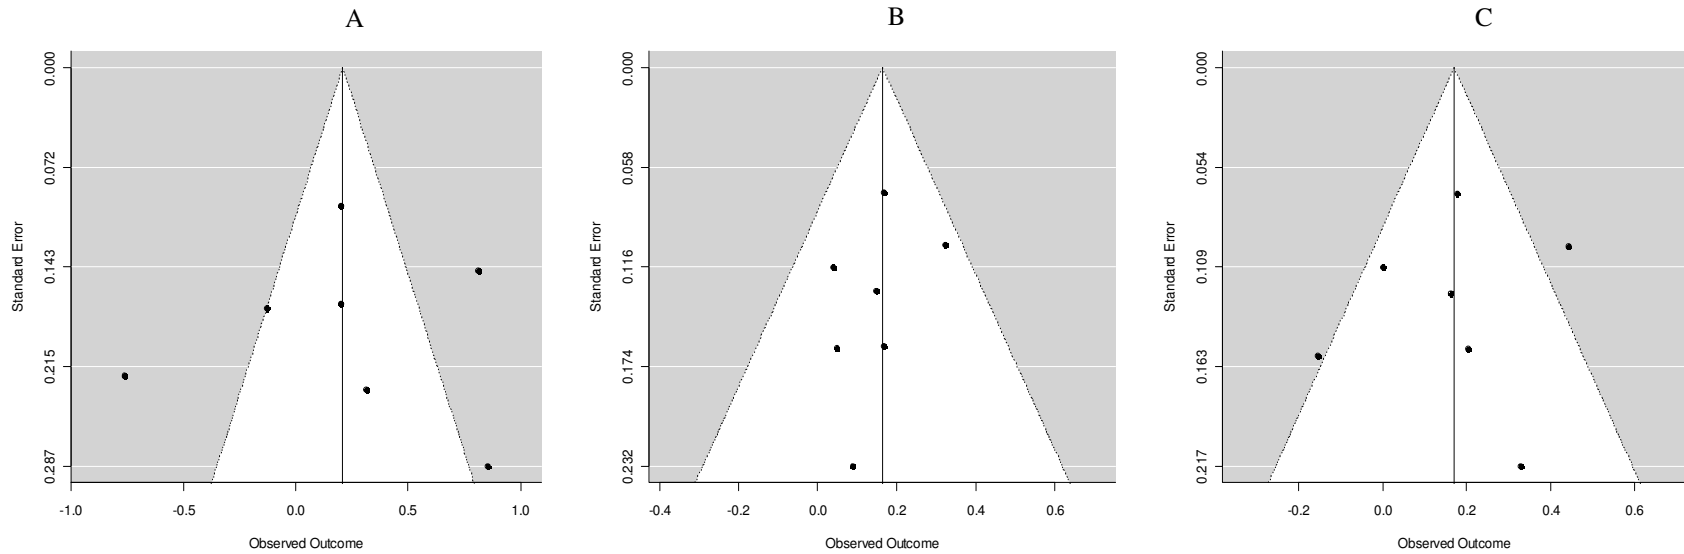

**Figure 3** Funnel plots with pseudo 95% confidence intervals for rs1800471 analysed according to different genotype contrasts. A. Comparison of the homozygous CC genotype with the wild type GG genotype (fixed-effect model,  $p$  for Egger's regression test = 0.75); B. Comparison of the heterozygous GC genotype with the wild type GG genotype (fixed-effect model,  $p$  for Egger's regression test = 0.89); C. Comparison of the variant genotype of CC+GC with the wild type GG genotype (fixed-effect model,  $p$  for Egger's regression test = 0.83).

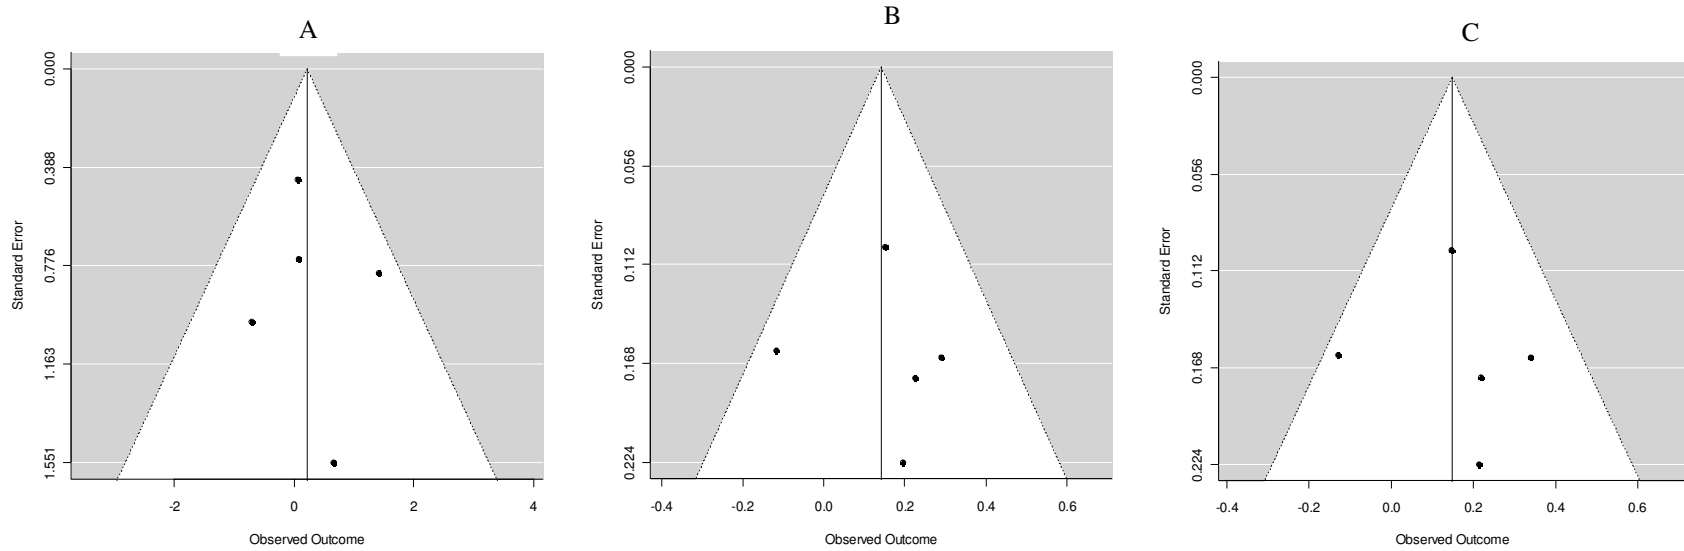

Supplement: 1471-2350-13-39-S3.pdf [file 1471-2350-13-39-S3.pdf]
